# Supplementary material for: Strain-tunable magnetic and electronic properties of monolayer CrI3
Source: Royal Society of Chemistry journal article supplement (doi:10.1039/c8cp07067a), 2019-01-01
Supplement: c8cp07067a1.pdf [file c8cp07067a1.pdf]

Supporting Information for

**Strain-tunable magnetic and electronic properties of monolayer CrI<sub>3</sub>**

Zewen Wu<sup>1</sup>, Jin Yu<sup>2,3</sup> and Shengjun Yuan<sup>1,2</sup>

1 School of Physics and Technology, Wuhan University, Wuhan 430072, China

2 Beijing Computational Science Research Center, Beijing 100094, China

3 Theory of Condensed Matter, Radboud University, Heyendaalseweg 135, 6525 AJ Nijmegen, the Netherlands

**Table S1** Total energy of monolayer CrI<sub>3</sub> with biaxial strain within DFT and DFT+U.  $E_{AFM}$  and  $E_{FM}$  are total energy for AFM and FM states, respectively. And  $\Delta E$  is defined as  $E_{AFM}-E_{FM}$ .

|                 | DFT     |         |         | DFT+U   |         |         |
|-----------------|---------|---------|---------|---------|---------|---------|
|                 | -6%     | 0       | 6%      | -6%     | 0       | 6%      |
| $E_{FM}$ (eV)   | -31.138 | -31.563 | -31.119 | -28.765 | -29.230 | -29.030 |
| $E_{AFM}$ (eV)  | -31.008 | -31.501 | -31.395 | -28.566 | -29.147 | -29.104 |
| $\Delta E$ (eV) | 0.130   | 0.062   | -0.275  | 0.199   | 0.083   | -0.074  |

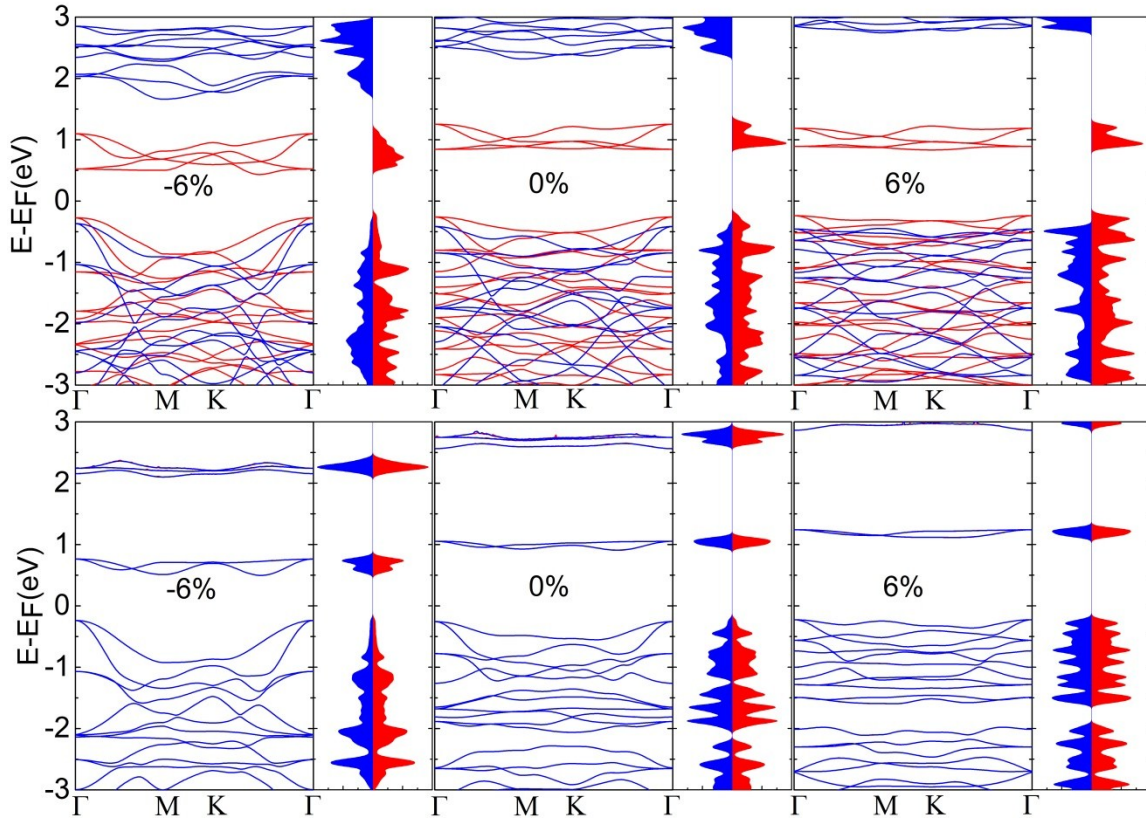

**Figure S1** Electronic structure of monolayer  $\text{CrI}_3$  with biaxial strain from DFT+U calculations. Top and bottom panel represent the result for the FM and AFM state, respectively. Red and blue indicate the spin-up and spin-down electrons. The Fermi level is set to zero.
